# Supplementary material for: Exploratory Profiling of Extracellular MicroRNAs in Cerebrospinal Fluid Comparing Leptomeningeal Metastasis with Other Central Nervous System Tumor Statuses
Source: J Clin Med. 2021 Oct 22;10(21):4860. doi: 10.3390/jcm10214860 (PMC8584800; doi:10.3390/jcm10214860)
Supplement: Supplementary file 1 [file jcm-10-04860-s001.zip › Supplementary Table S1.xlsx]

## Sheet: Supplementary Table 1
Supplementary Table 1A. The purity and yield of extracellular RNA extracted from CSF according to patient groups. The amount of total RNA was determined using Nanodrop 1000 and the percentage of microRNA was measured using Agilent BioAnalyzer 2100.
Patients group	A260/280	A260/230	Total RNA (mg)	MicroRNA (%) mean (range)
	mean (±SD)	mean (±SD)	mean (range)
Cancer control	1.31 (±0.33)	1.25 (±0.18)	5.69 (4.43–7.22)	57 (40–69)
Healthy control	1.33 (±0.40)	1.29 (±0.26)	6.54 (3.34–13.31)	50 (9–65)
Leptomeningeal Metastasis	1.93 (±0.18)	0.60 (±0.04)	9.28 (2.80–26.59)	28 (11–59)
Brain metastasis	1.69 (±0.56)	1.10 (±0.15)	6.59 (2.83–11.62)	27 (1–59)
Brain tumor	1.30 (±0.32)	1.29 (±0.15)	6.35 (4.05–10.05)	17 (1–49)

## Sheet: Sampling site
Supplementary Table 1B. Sampling site of CSF samples
CC (n=11)		HC (n=12)		LM (n=22)		BM (n=11)		BT (n=9)
Sample ID	Sample site	Sample ID	Sample site	Sample ID	Sample site	Sample ID	Sample site	Sample ID	Sample site
1243	L	1427	C	2272	L	3001	C	4009	V
1264	L	1428	C	2270	V	3011	L	4075	L
1295	L	1432	C	2479	V	3012	L	4084	C
2266	L	1434	C	2481	L	3013	L	4008	L
1311	L	1438	C	2494	L	3022	L	4036	V
1491	L	1448	C	2483	V	3033	L	4040	L
1479	L	1555	C	2447	V	3034	C	4019	L
2171	L	1416	C	2450	L	4042	L	4074	L
1102	L	1417	C	2327	V	3157	L	4074	L
1307	L	1536	C	2323	L	4044	L
1002	L	1103	L	3023	L	4063	L
		5001	L	2392	V
				2289	L
				2288	V
				2457	L
				2456	V
				2100	V
				2112	L
				2102	L
				2103	V
				2110	L
				2292	L
