# Supplementary material for: Exploratory Profiling of Extracellular MicroRNAs in Cerebrospinal Fluid Comparing Leptomeningeal Metastasis with Other Central Nervous System Tumor Statuses
Source: J Clin Med. 2021 Oct 22;10(21):4860. doi: 10.3390/jcm10214860 (PMC8584800; doi:10.3390/jcm10214860)
Supplement: Supplementary file 1 [file jcm-10-04860-s001.zip › Supplementary Table S2.xlsx]

## Sheet: Supplementary Table 2A
Supplementary Table 2. List of differentially expressed miRNAs between each patients groups by significance analysis of microarrays
CC vs. HC
Probe_ID	foldchange(unlogged)	q-value(%)
hsa-miR-548av-3p	1.31271	0
hsa-miR-3167	1.25563	0
hsa-miR-3160-3p	1.35118	0

## Sheet: Supplementary Table 2B
Supplementary Table 2. List of differentially expressed miRNAs between each patients groups by significance analysis of microarrays
LM vs. Control
Probe_ID	foldchange(unlogged)	q-value(%)
hsa-miR-4275	15.3752	0
hsa-miR-466	13.351	0
hsa-miR-98-3p	11.2352	0
hsa-miR-34b-3p	10.6634	0
hsa-miR-3128	9.96028	0
hsa-miR-3119	9.3814	0
hsa-miR-3591-3p	8.64093	0
hsa-miR-4536-3p	7.41696	0
hsa-miR-3145-5p	7.31324	0
hsa-let-7a-3p	6.81038	0
hsa-miR-8084	6.5355	0
hsa-miR-656-3p	5.9418	0
hsa-miR-4423-3p	5.8281	0
hsa-miR-4445-3p	5.80367	0
hsa-miR-30b-5p	5.57256	0
hsa-miR-190a-3p	5.48593	0
hsa-miR-4307	5.2082	0
hsa-miR-122-3p	5.18055	0
hsa-miR-3201	5.0676	0
hsa-miR-335-5p	4.9705	0
hsa-miR-5007-3p	4.93137	0
hsa-miR-1279	4.90013	0
hsa-miR-4699-3p	4.72603	0
hsa-miR-6509-3p	4.71994	0
hsa-miR-885-5p	4.70719	0
hsa-miR-576-5p	4.53402	0
hsa-miR-556-3p	4.30186	0
hsa-miR-3173-5p	4.25504	0
hsa-miR-3681-3p	4.18036	0
hsa-miR-3927-5p	4.1364	0
hsa-miR-6504-3p	4.10929	0
hsa-miR-302f	3.87076	0
hsa-miR-6507-3p	3.80299	0
hsa-miR-30c-5p	3.77862	0
hsa-miR-4650-5p	3.62826	0
hsa-miR-4796-5p	3.52315	0
hsa-miR-4694-5p	3.49644	0
hsa-miR-4295	3.4924	0
hsa-miR-6716-3p	3.48422	0
hsa-miR-4790-5p	3.46266	0
hsa-miR-548ap-3p	3.41343	0
hsa-miR-2053	3.39345	0
hsa-miR-4999-3p	3.39079	0
hsa-miR-647	3.36759	0
hsa-miR-371b-5p	3.33362	0
hsa-miR-3133	3.29335	0
hsa-miR-5011-5p	3.25953	0
hsa-miR-609	3.14569	0
hsa-miR-5583-5p	3.09438	0
hsa-let-7f-1-3p	3.04795	0
hsa-miR-1468-3p	3.01525	0
hsa-let-7f-2-3p	3.01447	0
hsa-miR-633	3.01091	0
hsa-miR-6761-5p	2.9594	0
hsa-miR-3529-3p	2.93697	0
hsa-miR-1282	2.83122	0
hsa-miR-558	2.79805	0
hsa-miR-3134	2.79401	0
hsa-miR-219a-5p	2.79184	0
hsa-miR-26a-2-3p	2.75803	0
hsa-miR-382-3p	2.72826	0
hsa-miR-4456	2.71667	0
hsa-miR-4529-3p	2.67298	0
hsa-let-7b-3p	2.64262	0
hsa-miR-301a-5p	2.63511	0
hsa-miR-548f-3p	2.60648	0
hsa-miR-4760-3p	2.60372	0
hsa-miR-606	2.59578	0
hsa-miR-3617-3p	2.57768	0
hsa-miR-3682-5p	2.5219	0
hsa-let-7c-3p	2.51375	0
hsa-miR-5590-5p	2.48204	0
hsa-miR-380-3p	2.47189	0
hsa-miR-3129-3p	2.45934	0
hsa-miR-451b	2.42255	0
hsa-miR-548c-3p	2.38438	0
hsa-miR-548t-3p	2.36157	0
hsa-miR-548aa	2.36157	0
hsa-miR-376b-5p	2.31635	0
hsa-miR-204-5p	2.31463	0
hsa-miR-26b-3p	2.30358	0
hsa-miR-4703-5p	2.29457	0
hsa-miR-3975	2.2678	0
hsa-miR-548j-3p	2.25526	0
hsa-miR-365a-3p	2.22596	0
hsa-miR-365b-3p	2.22596	0
hsa-miR-744-3p	2.20545	0
hsa-miR-335-3p	2.19578	0
hsa-miR-379-3p	2.18331	0
hsa-let-7d-3p	2.17453	0
hsa-miR-7-1-3p	2.16431	0
hsa-miR-211-5p	2.1634	0
hsa-miR-4290	2.16101	0
hsa-miR-654-3p	2.13783	0
hsa-miR-3942-3p	2.1249	0
hsa-miR-3064-3p	2.11858	0
hsa-miR-6847-3p	2.06837	0
hsa-miR-764	2.06248	0
hsa-miR-7973	2.0622	0
hsa-miR-613	2.04608	0
Probe_ID	foldchange(unlogged)	q-value(%)
hsa-miR-548ac	0.492956	0
hsa-miR-4708-3p	0.482175	0.211581
hsa-miR-548a-3p	0.481109	0
hsa-miR-4797-5p	0.451355	0
hsa-miR-1263	0.395058	0
hsa-miR-1298-3p	0.350417	0
hsa-miR-3921	0.341593	0
hsa-miR-455-3p	0.29084	0

## Sheet: Supplementary Table 2C
Supplementary Table 2. List of differentially expressed miRNAs between each patients groups by significance analysis of microarrays
BM vs. Control
Probe_ID	foldchange(unlogged)	q-value(%)
hsa-miR-466	12.277	1.39782
hsa-miR-4275	11.7734	1.5975
hsa-miR-98-3p	9.49913	3.43323
hsa-miR-34b-3p	6.73012	3.43323
hsa-miR-3591-3p	6.22149	1.44959
hsa-miR-3145-5p	5.72546	0
hsa-miR-7847-3p	5.05636	5.77889
hsa-miR-3119	4.83043	3.43323
hsa-miR-656-3p	4.55692	3.43323
hsa-miR-885-5p	4.39543	0
hsa-let-7a-3p	4.31032	1.5975
hsa-miR-30b-5p	4.16483	1.5975
hsa-miR-3128	3.98095	3.43323
hsa-miR-122-3p	3.90345	3.43323
hsa-miR-30c-5p	3.72582	1.5975
hsa-miR-4307	3.66433	3.43323
hsa-miR-6507-3p	3.50284	1.5975
hsa-miR-1279	3.5024	1.5975
hsa-miR-576-5p	3.43513	3.43323
hsa-miR-6509-3p	3.28887	6.22664
hsa-miR-4699-3p	3.22337	3.43323
hsa-let-7f-1-3p	3.18051	1.5975
hsa-miR-3681-3p	3.16767	3.43323
hsa-miR-5007-3p	3.15214	0
hsa-miR-4796-5p	3.11999	3.43323
hsa-miR-6504-3p	2.98705	3.43323
hsa-miR-4529-3p	2.90936	0
hsa-miR-6800-3p	2.80675	5.77889
hsa-miR-4790-5p	2.77897	3.43323
hsa-miR-3927-5p	2.76366	3.43323
hsa-miR-2053	2.68613	3.43323
hsa-miR-302f	2.62068	3.43323
hsa-miR-3133	2.61033	0
hsa-miR-4423-3p	2.58394	3.43323
hsa-miR-6716-3p	2.56102	3.43323
hsa-miR-8084	2.54316	7.31166
hsa-miR-4999-3p	2.51215	3.43323
hsa-miR-1281	2.45351	5.66484
hsa-let-7b-3p	2.42188	5.77889
hsa-miR-3173-5p	2.3657	3.43323
hsa-let-7f-2-3p	2.35363	3.3452
hsa-miR-3529-3p	2.34699	3.43323
hsa-miR-4295	2.32283	2.17438
hsa-miR-4445-3p	2.24107	8.54975
hsa-miR-5011-5p	2.23839	3.43323
hsa-miR-4694-5p	2.22041	8.54975
hsa-miR-3129-3p	2.20758	7.53475
hsa-miR-335-3p	2.19886	1.5975
hsa-miR-609	2.19864	3.43323
hsa-miR-3134	2.19694	3.43323
hsa-miR-7-1-3p	2.19292	3.43323
hsa-miR-4650-5p	2.17033	6.33461
hsa-miR-3617-3p	2.15912	3.3452
hsa-miR-301a-5p	2.12852	5.77889
hsa-miR-548f-3p	2.11371	9.31878
hsa-miR-647	2.05389	6.33461
hsa-miR-380-3p	2.04189	3.43323
hsa-miR-1234-3p	2.03151	3.43323
hsa-miR-1282	2.02696	1.44959
Probe_ID	foldchange(unlogged)	q-value(%)
hsa-miR-1298-3p	0.183335	0
hsa-miR-1263	0.384126	0
hsa-miR-4708-3p	0.226513	0
hsa-miR-628-5p	0.274878	0
hsa-miR-4797-5p	0.319046	0
hsa-miR-4742-5p	0.331775	0
hsa-miR-548ac	0.436229	0
hsa-miR-6794-5p	0.400058	0
hsa-miR-6868-5p	0.32952	0
hsa-miR-877-5p	0.325681	0
hsa-miR-1272	0.383181	0
hsa-miR-6756-5p	0.47068	0
hsa-miR-6727-5p	0.43499	0
hsa-miR-5004-5p	0.392843	0
hsa-miR-3619-5p	0.220662	0
hsa-miR-602	0.380627	0
hsa-miR-548a-3p	0.443792	0
hsa-miR-6798-5p	0.486417	2.05994
hsa-miR-3124-5p	0.40406	1.32674
hsa-miR-2277-5p	0.388299	1.30463
hsa-miR-32-5p	0.465739	4.28081
hsa-miR-668-5p	0.397801	4.28081
hsa-miR-200b-5p	0.365953	5.87083
hsa-miR-3960	0.482322	6.12228
hsa-miR-548u	0.457669	7.78679
hsa-miR-16-2-3p	0.458434	8.54975
hsa-miR-1908-5p	0.416907	8.41303
hsa-miR-450b-5p	0.491705	8.41303
hsa-miR-4791	0.46742	8.41303
hsa-miR-451a	0.420823	8.81506

## Sheet: Supplementary Table 2D
Supplementary Table 2. List of differentially expressed miRNAs between each patients groups by significance analysis of microarrays
BT vs. Control
Probe_ID	foldchange(unlogged)	q-value(%)
hsa-miR-4708-3p	0.424339	0
hsa-miR-6868-5p	0.47202	0
hsa-miR-4754	0.777685	0
hsa-miR-1263	0.551779	0

## Sheet: Supplementary Table 2E
Supplementary Table 2. List of differentially expressed miRNAs between each patients groups by significance analysis of microarrays
LM vs. BM
Probe_ID	foldchange(unlogged)	q-value(%)
hsa-miR-3124-5p	4.73742	0
hsa-miR-3619-5p	4.25127	0
hsa-miR-8084	4.17149	0
hsa-miR-3201	4.14281	0
hsa-miR-3128	3.89115	0
hsa-miR-335-5p	3.70869	0
hsa-miR-602	3.42744	0
hsa-miR-877-5p	3.35662	0
hsa-miR-4445-3p	3.14686	0
hsa-miR-4423-3p	3.10768	0
hsa-miR-668-5p	2.9494	0
hsa-miR-371b-5p	2.65385	0
hsa-miR-3119	2.62742	0
hsa-miR-4536-3p	2.49402	0
hsa-miR-2277-5p	2.48096	4.93886
hsa-miR-6798-5p	2.38843	1.78908
hsa-miR-6794-5p	2.31665	4.93886
hsa-miR-3613-3p	2.29236	0
hsa-miR-4668-5p	2.2381	0
hsa-miR-7154-5p	2.23719	1.99238
hsa-miR-4742-5p	2.22558	0
hsa-miR-3910	2.21538	0
hsa-miR-8072	2.14308	4.93886
hsa-miR-4708-3p	2.13887	0
hsa-miR-190a-3p	2.10298	0
hsa-miR-635	2.08405	0
hsa-miR-4275	2.06741	0
hsa-miR-16-2-3p	2.06632	0
hsa-miR-503-5p	2.02455	0
hsa-miR-584-3p	2.0181	6.4145
hsa-miR-498	1.99739	7.14659
hsa-miR-548ap-3p	1.96861	0
hsa-miR-4650-5p	1.9077	4.93886
hsa-miR-1468-3p	1.89683	4.93886
hsa-miR-647	1.8515	10.143
hsa-miR-4717-3p	1.83609	0
hsa-miR-202-5p	1.83313	0
hsa-miR-466	1.81462	0
hsa-miR-4307	1.80294	4.93886
hsa-miR-34b-3p	1.80274	4.80355
hsa-miR-548x-3p	1.79852	0
hsa-miR-6511a-5p	1.75924	5.47905
hsa-let-7a-3p	1.75654	7.21946
hsa-miR-376c-5p	1.74711	0
hsa-miR-376b-5p	1.74115	5.47905
hsa-miR-6748-5p	1.7376	3.07596
hsa-miR-606	1.73669	0
hsa-miR-3591-3p	1.7363	4.93886
hsa-miR-6868-5p	1.73292	1.94811
hsa-miR-6782-5p	1.71486	6.74345
hsa-miR-6506-5p	1.7115	0
hsa-miR-5004-5p	1.69786	2.03872
hsa-miR-4785	1.6954	6.74345
hsa-miR-155-3p	1.68734	0
hsa-miR-4786-3p	1.68281	1.86521
hsa-miR-6879-5p	1.67878	7.54106
hsa-miR-4791	1.67477	3.07596
hsa-miR-1272	1.66175	0
hsa-miR-4694-5p	1.6587	7.46084
hsa-miR-3927-5p	1.65773	4.93886
hsa-miR-3141	1.64738	4.93886
hsa-miR-548aq-3p	1.61851	0
hsa-miR-4776-5p	1.57551	5.47905
hsa-miR-26b-3p	1.56812	7.3823
hsa-miR-4308	1.56545	10.143
hsa-miR-6777-5p	1.56051	1.7533
hsa-miR-633	1.56012	5.47905
hsa-miR-5006-5p	1.55943	9.65118
hsa-miR-3942-5p	1.55205	9.0973
hsa-miR-1278	1.5464	0
hsa-miR-4649-5p	1.54532	6.74345
hsa-miR-26a-2-3p	1.54328	4.93886
hsa-miR-3177-3p	1.53622	3.07596
hsa-miR-4283	1.531	6.74345
hsa-miR-548al	1.52923	0
hsa-miR-5681a	1.52179	1.90576
hsa-miR-556-3p	1.51639	4.93886
hsa-miR-570-3p	1.5161	2.03872
hsa-miR-5583-5p	1.50767	4.45754
hsa-miR-122-3p	1.49168	1.82635
hsa-miR-6895-5p	1.4845	5.47905
hsa-miR-4720-5p	1.46256	7.21946
hsa-miR-548t-3p	1.44359	0
hsa-miR-548aa	1.44359	0
hsa-miR-5010-5p	1.43808	6.49369
hsa-miR-98-3p	1.43208	4.93886
hsa-miR-574-5p	1.41918	8.13385
hsa-miR-548h-3p	1.41605	3.30811
hsa-miR-548z	1.41605	3.30811
hsa-miR-509-5p	1.40206	3.24685
hsa-miR-1911-3p	1.39221	9.27224
hsa-miR-3942-3p	1.37304	6.33722
hsa-miR-603	1.34072	5.9233
hsa-miR-548j-3p	1.33558	3.43784
hsa-miR-221-5p	1.3323	0
hsa-miR-4682	1.30475	10.143
hsa-miR-658	1.29455	9.65118
hsa-miR-4644	1.29434	6.74345
hsa-miR-4750-5p	1.29214	4.87027
hsa-miR-511-3p	1.25364	9.65118
hsa-miR-1254	1.25162	5.47905
hsa-miR-181a-2-3p	1.22541	4.45754
hsa-miR-6874-3p	1.22324	9.0973
hsa-miR-4438	1.21248	6.74345
hsa-miR-6849-3p	1.15279	8.21858
Probe_ID	foldchange(unlogged)	q-value(%)
hsa-miR-1262	0.797378	10.143
hsa-miR-3692-3p	0.775794	8.51115
hsa-miR-4461	0.775544	10.143
hsa-miR-4680-5p	0.774272	10.143
hsa-miR-3200-5p	0.771754	10.143
hsa-miR-5194	0.765601	10.143
hsa-miR-6826-5p	0.755167	10.143
hsa-miR-3065-5p	0.708983	8.51115
hsa-miR-4454	0.663134	8.51115
hsa-miR-6893-3p	0.656107	8.51115
hsa-miR-1234-3p	0.497282	10.143
hsa-miR-3921	0.489449	10.143
hsa-miR-6776-5p	0.427414	8.51115
hsa-miR-455-3p	0.237441	10.143
hsa-miR-1281	0.228209	0
hsa-miR-7847-3p	0.182167	8.51115

## Sheet: Supplementary Table 2F
Supplementary Table 2. List of differentially expressed miRNAs between each patients groups by significance analysis of microarrays
LM vs. BT
Probe_ID	foldchange(unlogged)	q-value(%)
hsa-miR-4275	21.5638	0
hsa-miR-466	19.235	0
hsa-miR-3128	15.7576	0
hsa-miR-98-3p	12.2046	0
hsa-miR-3119	12.1035	0
hsa-miR-34b-3p	11.479	0
hsa-miR-4536-3p	8.71458	0
hsa-miR-3591-3p	8.11515	0
hsa-miR-8084	7.52677	0
hsa-miR-3145-5p	7.14218	0
hsa-miR-371b-5p	6.81249	0
hsa-miR-190a-3p	6.67963	0
hsa-miR-4445-3p	6.62431	0
hsa-miR-656-3p	6.59396	0
hsa-miR-4423-3p	6.23669	0
hsa-miR-335-5p	6.07867	0
hsa-miR-4529-3p	5.79924	0
hsa-let-7a-3p	5.73574	0
hsa-miR-4307	5.69761	0
hsa-miR-30b-5p	5.55599	0
hsa-miR-122-3p	5.39449	0
hsa-miR-6509-3p	5.15604	0
hsa-miR-4699-3p	4.99078	0
hsa-miR-3201	4.88046	0
hsa-miR-1279	4.85892	0
hsa-miR-556-3p	4.70717	0
hsa-miR-885-5p	4.51889	0
hsa-miR-4279	4.42743	0
hsa-miR-3173-5p	4.40025	0
hsa-miR-3681-3p	4.39798	0
hsa-miR-6504-3p	4.3677	0
hsa-miR-5007-3p	4.32941	0
hsa-miR-548ap-3p	4.18399	0
hsa-miR-576-5p	4.12375	0
hsa-miR-302f	4.08947	0
hsa-miR-6507-3p	3.83652	0
hsa-miR-3927-5p	3.75326	0
hsa-miR-647	3.69975	0
hsa-miR-4650-5p	3.66193	0
hsa-let-7f-2-3p	3.5773	0
hsa-miR-609	3.51272	0
hsa-miR-4796-5p	3.50383	0
hsa-miR-4790-5p	3.49479	0
hsa-miR-5583-5p	3.38421	0
hsa-miR-3133	3.36274	0
hsa-miR-4999-3p	3.26387	0
hsa-miR-2053	3.19012	0
hsa-miR-548t-3p	3.18881	0
hsa-miR-548aa	3.18881	0
hsa-miR-4295	3.1844	0
hsa-miR-6716-3p	3.17803	0
hsa-let-7f-1-3p	3.12724	0
hsa-miR-606	3.11284	0
hsa-miR-633	3.08884	0
hsa-miR-1282	3.04444	0
hsa-miR-30c-5p	3.04088	0
hsa-miR-5011-5p	3.01842	0
hsa-miR-558	2.98604	0
hsa-miR-4694-5p	2.90879	0
hsa-miR-3529-3p	2.90433	0
hsa-let-7b-3p	2.82957	0
hsa-miR-1468-3p	2.80411	0
hsa-miR-548c-3p	2.77925	0
hsa-miR-6761-5p	2.70582	0.354838
hsa-miR-3682-5p	2.66365	0
hsa-miR-26b-3p	2.64531	0
hsa-miR-382-3p	2.64079	0
hsa-miR-301a-5p	2.62406	0
hsa-miR-4456	2.60388	0
hsa-miR-219a-5p	2.57054	0
hsa-miR-3134	2.56799	0
hsa-miR-3124-5p	2.55839	5.64965
hsa-miR-548f-3p	2.55345	0
hsa-miR-26a-2-3p	2.52837	0
hsa-let-7c-3p	2.51229	0
hsa-miR-376b-5p	2.47655	0
hsa-miR-4290	2.45654	0
hsa-miR-5590-5p	2.40025	0
hsa-miR-380-3p	2.34581	0
hsa-miR-3617-3p	2.33893	0
hsa-miR-3942-3p	2.2829	0
hsa-miR-635	2.26014	0
hsa-miR-3129-3p	2.25899	0
hsa-miR-744-3p	2.21172	0
hsa-miR-548az-3p	2.20085	0
hsa-miR-4703-5p	2.18871	0
hsa-miR-4760-3p	2.17588	0.371735
hsa-miR-451b	2.11264	0
hsa-miR-204-5p	2.10738	0
hsa-miR-3064-3p	2.09568	0
hsa-miR-7-1-3p	2.09434	0
hsa-miR-613	2.06704	0
hsa-miR-8075	2.06189	0
hsa-miR-5702	2.05487	0
hsa-miR-548j-3p	2.05253	0
hsa-miR-4666a-3p	2.03766	0
hsa-miR-299-5p	2.03378	0
hsa-miR-6847-3p	2.03046	0
hsa-miR-3140-5p	2.02885	0
hsa-miR-155-3p	2.02847	0
hsa-miR-4308	2.00247	0
hsa-miR-379-3p	2.00062	0
Probe_ID	foldchange(unlogged)	q-value(%)
hsa-miR-24-3p	0.267203	8.89881
hsa-miR-103a-3p	0.330239	8.89881
hsa-miR-3921	0.332649	0
hsa-miR-455-3p	0.360747	0
hsa-let-7e-5p	0.365032	8.52659
hsa-let-7c-5p	0.392139	8.42043
hsa-miR-107	0.433667	5.16331
hsa-miR-6756-5p	0.451289	0
hsa-miR-194-5p	0.469281	6.14277
hsa-miR-320b	0.482971	9.24241
hsa-miR-200b-5p	0.488386	2.30448

## Sheet: Supplementary Table 2G
Supplementary Table 2. List of differentially expressed miRNAs between each patients groups by significance analysis of microarrays
BM vs. BT
Probe_ID	foldchange(unlogged)	q-value(%)
hsa-miR-4529-3p	4.92543	0
Probe_ID	foldchange(unlogged)	q-value(%)
hsa-miR-604	0.82227	0
hsa-miR-10b-3p	0.796626	0
hsa-miR-601	0.794255	0
hsa-miR-1912	0.790985	0
hsa-miR-7706	0.774644	0
hsa-miR-6846-5p	0.774354	0
hsa-miR-637	0.746802	0
hsa-miR-4776-5p	0.74386	0
hsa-miR-6748-5p	0.725417	0
hsa-miR-5090	0.724117	0
hsa-miR-2110	0.715613	0
hsa-miR-3141	0.691656	0
hsa-miR-4449	0.666569	0
hsa-miR-4743-5p	0.642671	0
hsa-miR-6506-5p	0.578902	0
hsa-miR-6794-5p	0.538211	0
hsa-miR-3656	0.49437	0
hsa-miR-5004-5p	0.489543	0
hsa-miR-6798-5p	0.467182	0
hsa-miR-668-5p	0.464665	0
hsa-miR-6756-5p	0.45836	0
hsa-miR-1298-3p	0.443634	0
hsa-miR-4797-5p	0.429263	0
hsa-miR-602	0.423055	0
hsa-miR-877-5p	0.387754	0
hsa-miR-2277-5p	0.352758	0
hsa-miR-3619-5p	0.319393	0
hsa-miR-200b-5p	0.314641	0
hsa-miR-4742-5p	0.301574	0
